# Supplementary material
Source: ML conference proceedings conference paper supplement (https://openreview.net/forum?id=vJtnJfS2mQ)

# Codebook vs Encoder Effective Dimensionality Over Training Steps

## Background Dim = 64

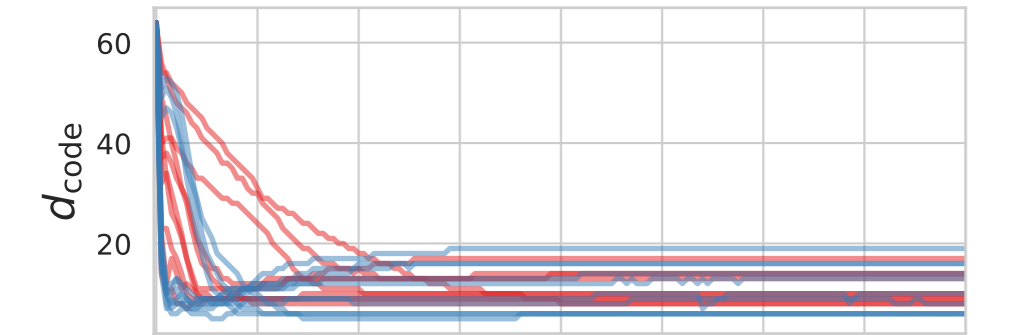

## Background Dim = 128

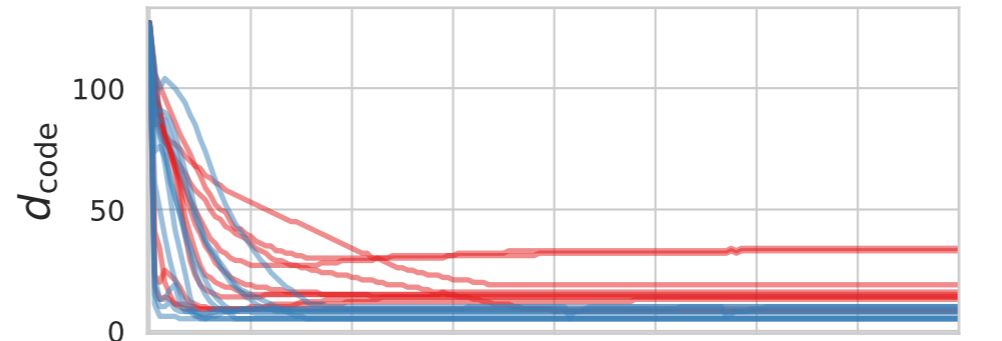

## Background Dim = 256

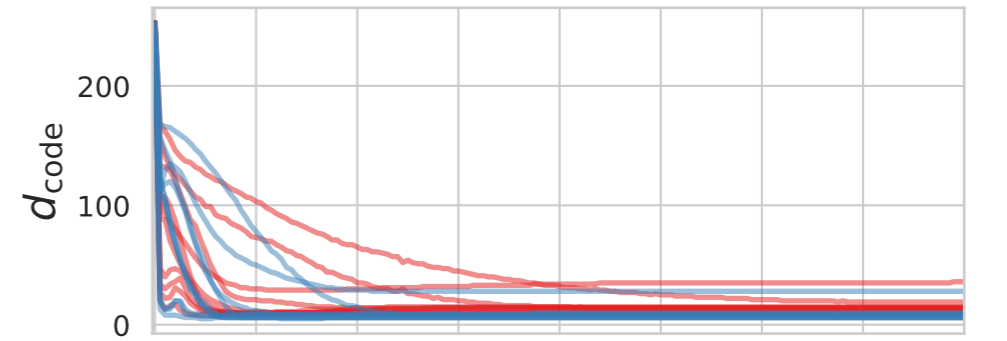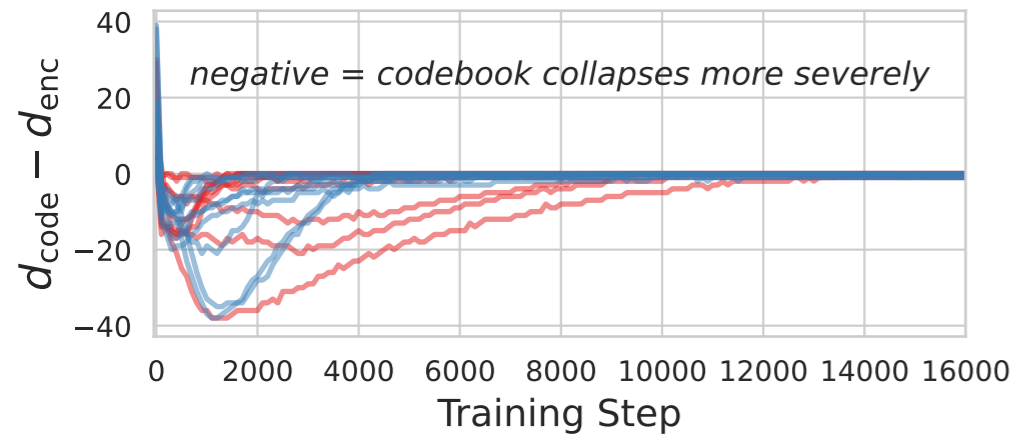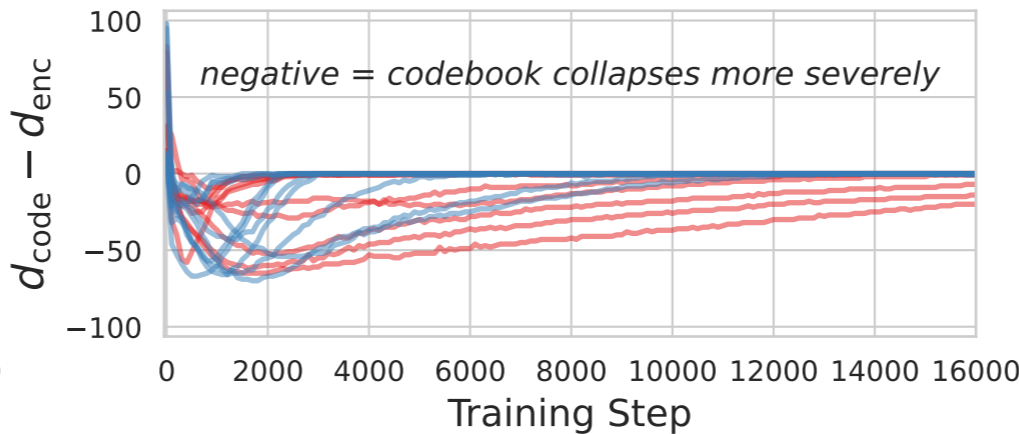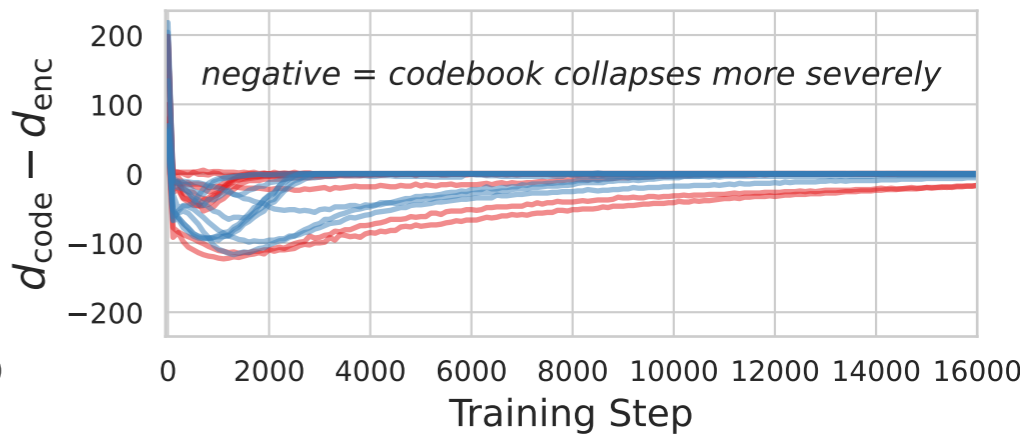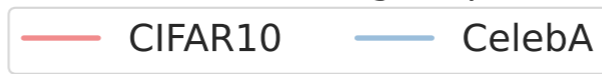

Supplement: supplementary_material [file combined_codebook_vs_encoder_eff_dim_over_global_step.pdf › repo/512_figures/combined_codebook_vs_encoder_eff_dim_over_global_step.pdf]
