# Supplementary material
Source: ML conference proceedings conference paper supplement (https://openreview.net/forum?id=vJtnJfS2mQ)

# Difference Between Codebook and Encoder Effective Dimensionality Over Training Steps (negative = codebook collapses more severely)

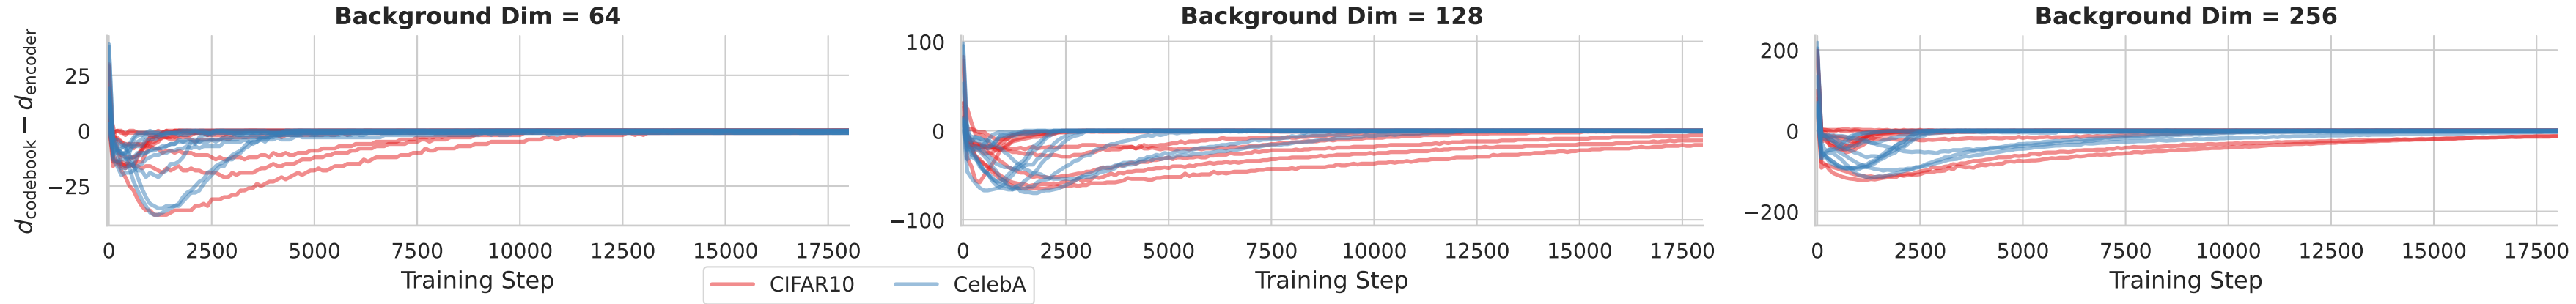

Supplement: supplementary_material [file enc_codebook_eff_dim_diff_over_global_step.pdf › repo/512_figures/enc_codebook_eff_dim_diff_over_global_step.pdf]
