# Supplementary material
Source: ML conference proceedings conference paper supplement (https://openreview.net/forum?id=vJtnJfS2mQ)
Supplement: supplementary_material [file large_scale_val_loss_vs_eff_dim_vs_codebook_size.pdf › repo/512_figures/large_scale_val_loss_vs_eff_dim_vs_codebook_size.pdf]

# Validation Loss vs. Effective Dimension Colored by Codebook Size

CelebA, CNN, f=4

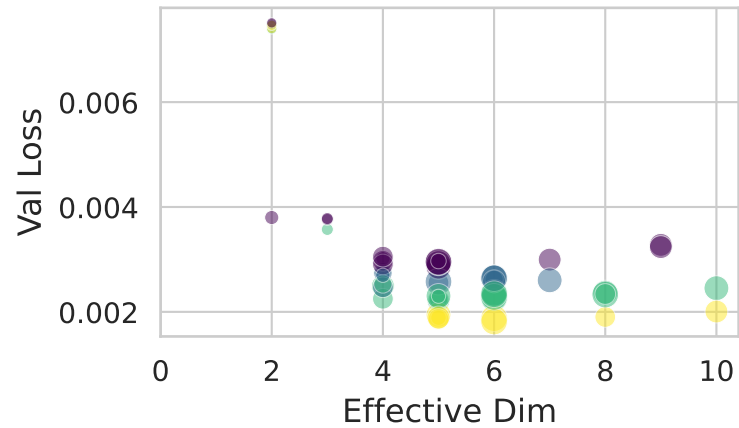

CelebA, ViT, f=4

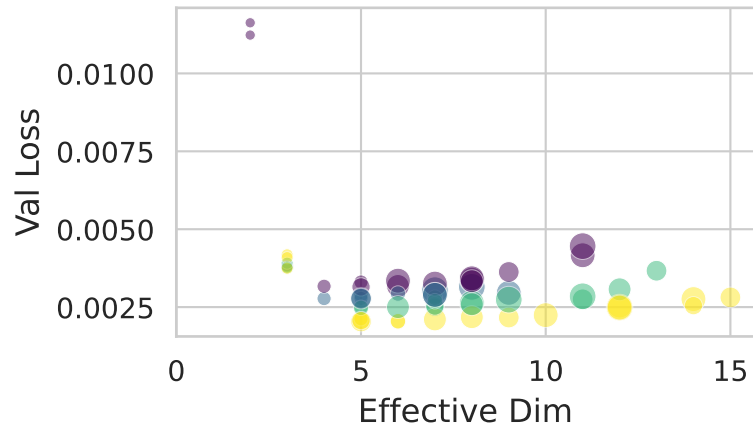

CelebA, CNN, f=16

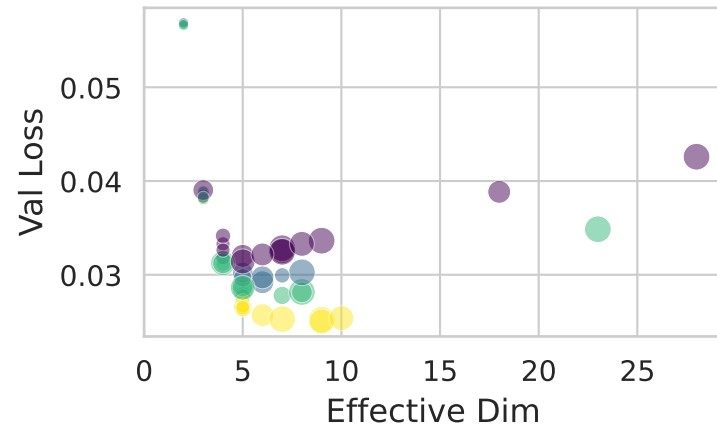

CelebA, ViT, f=16

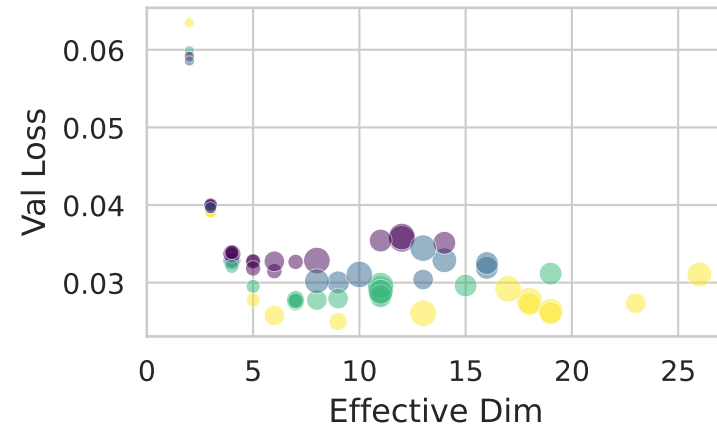

CIFAR10, CNN, f=4

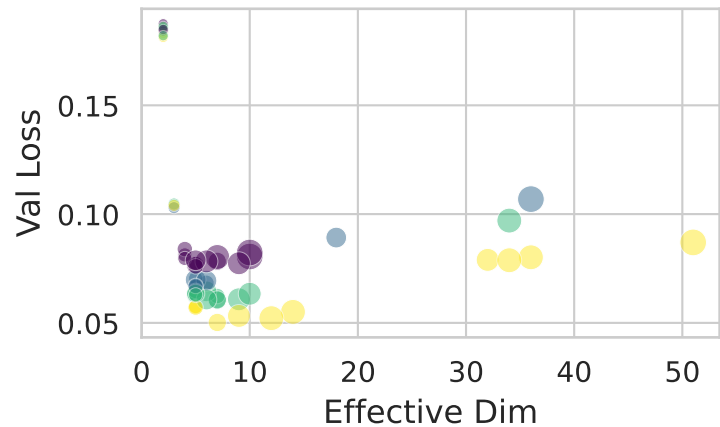

CIFAR10, ViT, f=4

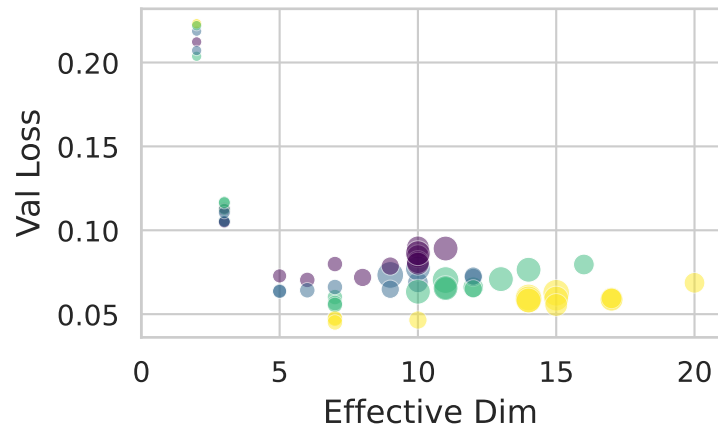

CIFAR10, CNN, f=16

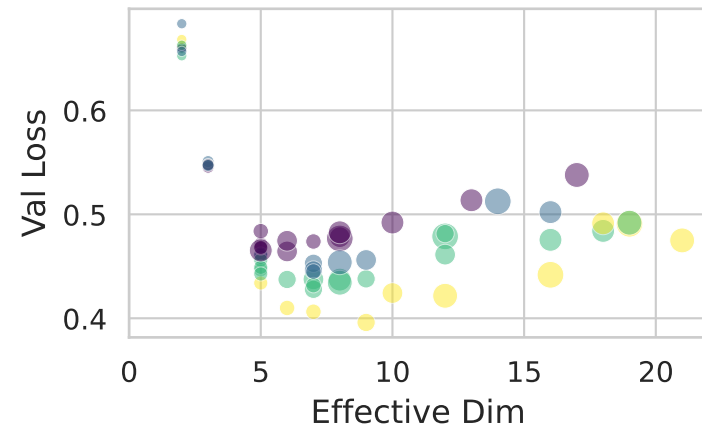

CIFAR10, ViT, f=16

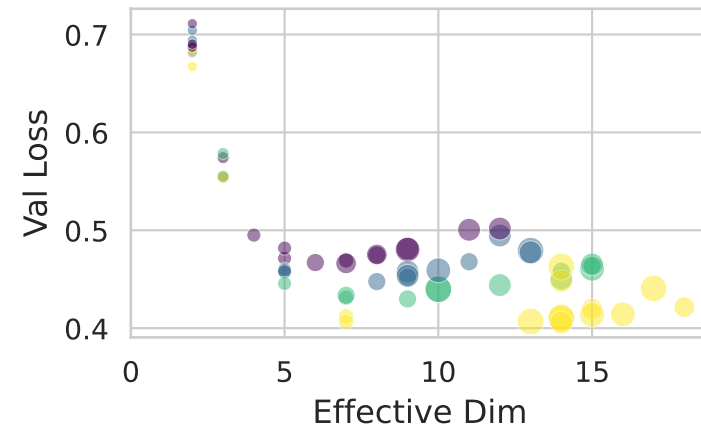

Codebook Size

512

1024

2048

8192

Background Dim

3

4

6

8

16

32

64

128

256
