# Supplementary material
Source: ML conference proceedings conference paper supplement (https://openreview.net/forum?id=vJtnJfS2mQ)

# Per-Hyperparameter Correlation Across Background Dimensions

Pearson Correlation with Effective Dim

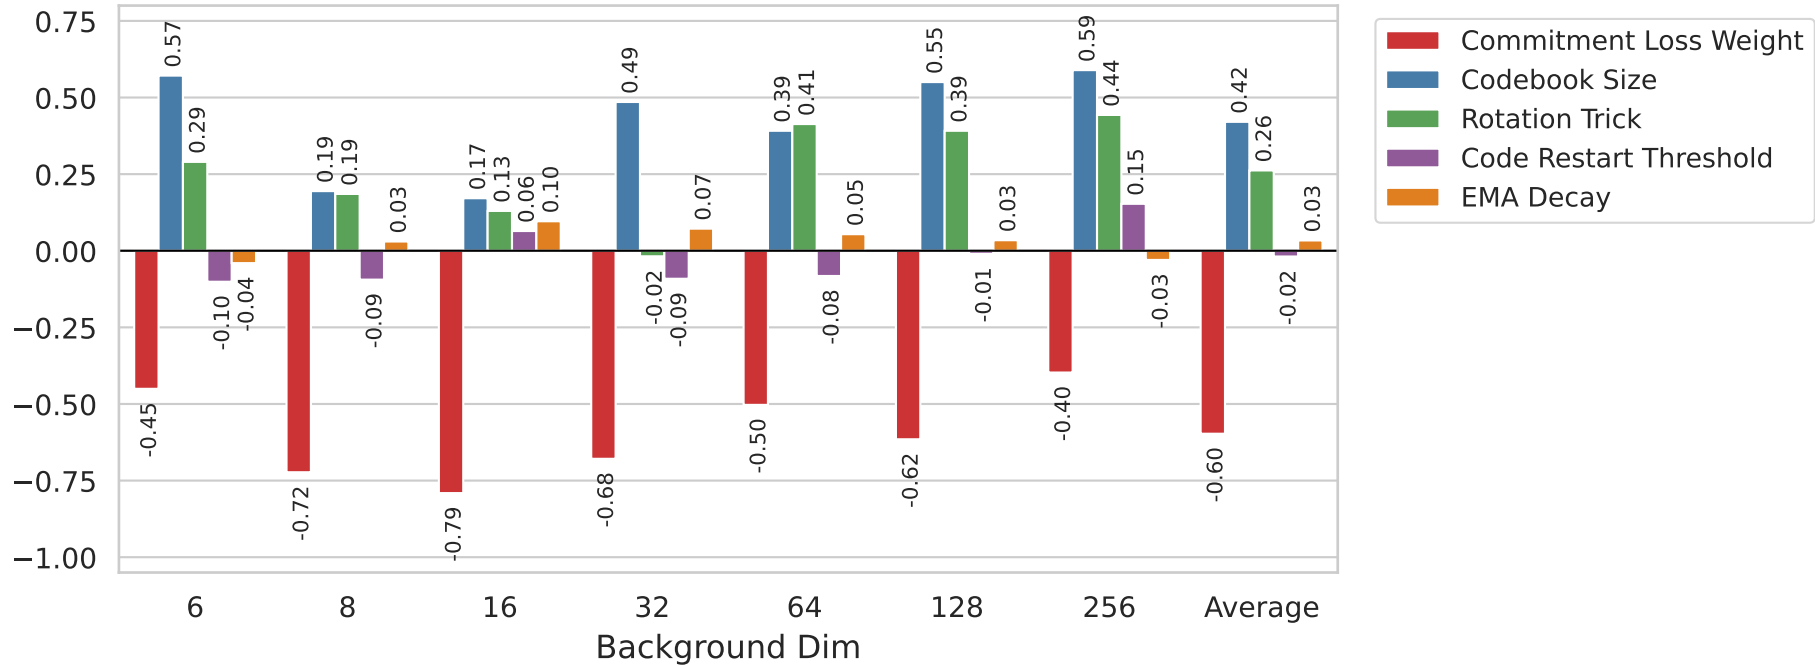

Supplement: supplementary_material [file per_hyperparameter_correlation_with_eff_dim.pdf › repo/512_figures/per_hyperparameter_correlation_with_eff_dim.pdf]
