# Supplementary material
Source: ML conference proceedings conference paper supplement (https://openreview.net/forum?id=vJtnJfS2mQ)

# Rank Regularization Weight vs Val Loss and Effective Dim

## CIFAR10, CNN, f=4

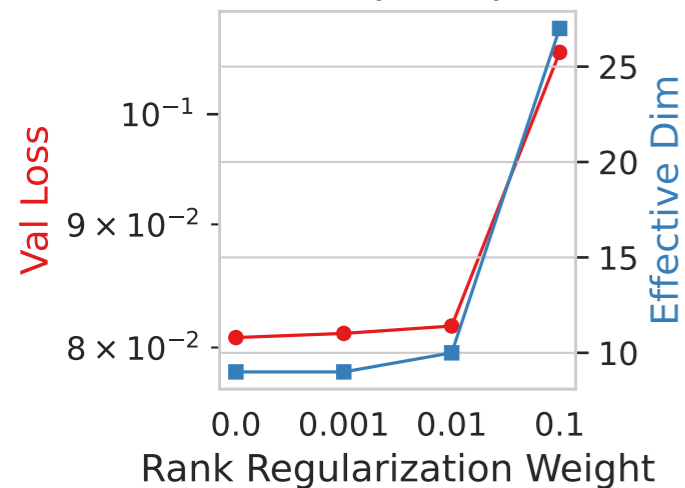

## CIFAR10, ViT, f=4

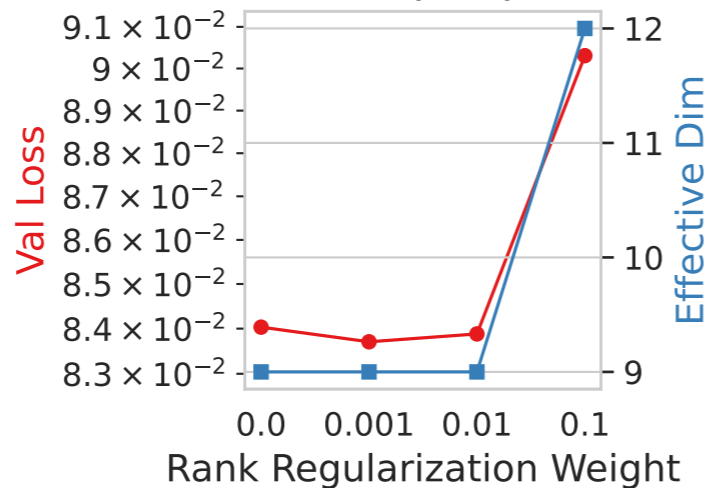

## CIFAR10, CNN, f=16

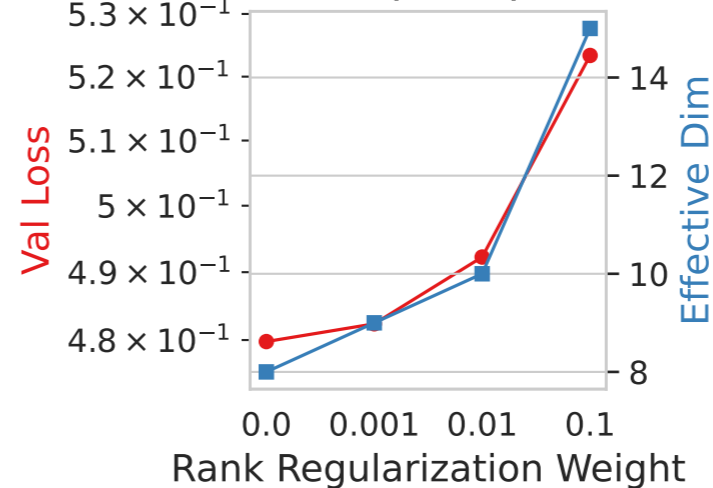

## CIFAR10, ViT, f=16

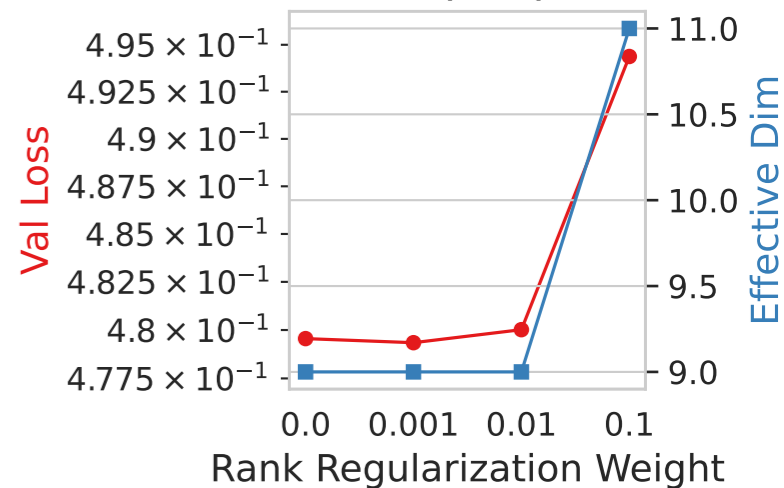

## CelebA, CNN, f=4

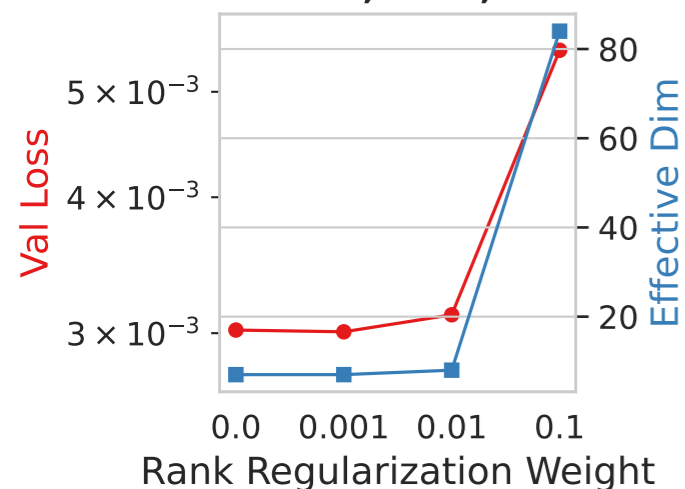

## CelebA, ViT, f=4

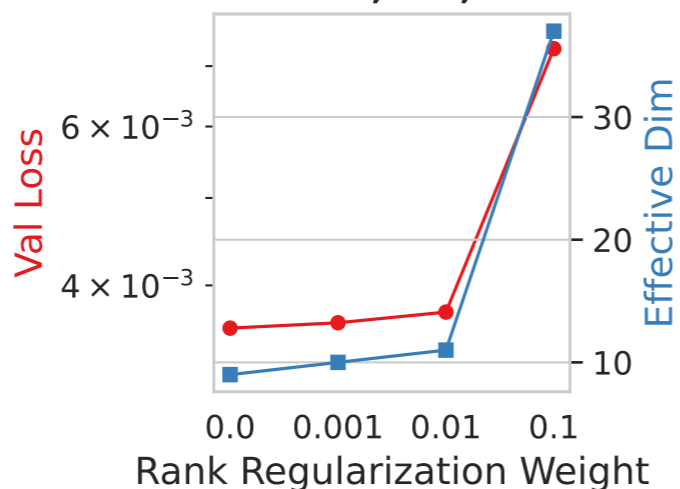

## CelebA, CNN, f=16

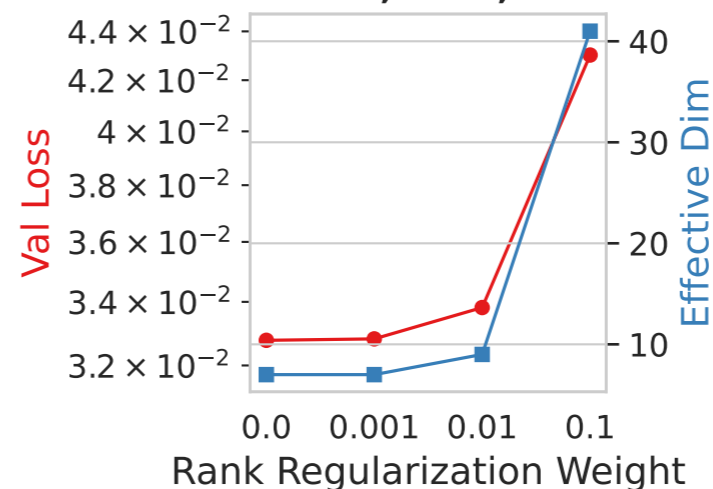

## CelebA, ViT, f=16

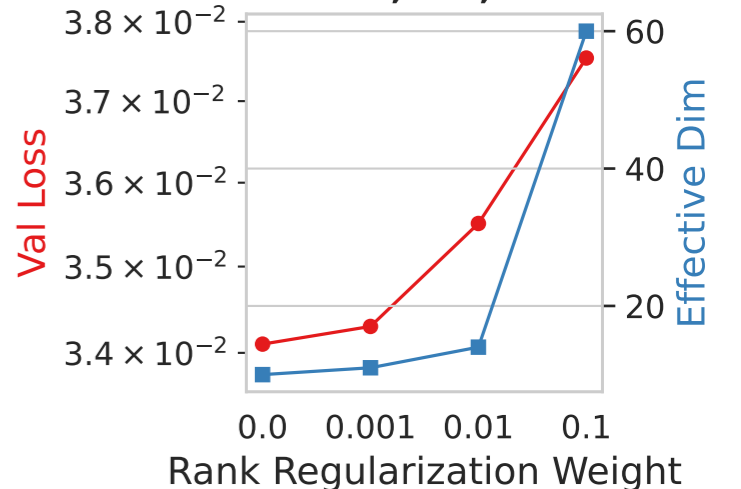

Supplement: supplementary_material [file rank_regularization_weight_vs_val_loss_effective_dim.pdf › repo/koleo_figures/rank_regularization_weight_vs_val_loss_effective_dim.pdf]
