# Supplementary material
Source: ML conference proceedings conference paper supplement (https://openreview.net/forum?id=vJtnJfS2mQ)

# Codebook Effective Dim over Training Steps

Background Dim = 64

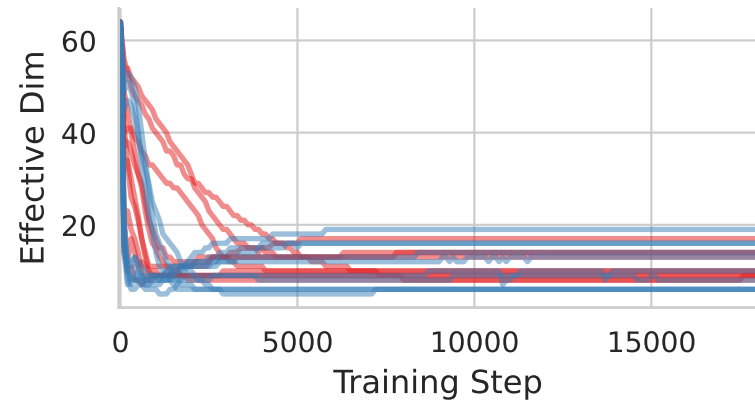

Background Dim = 128

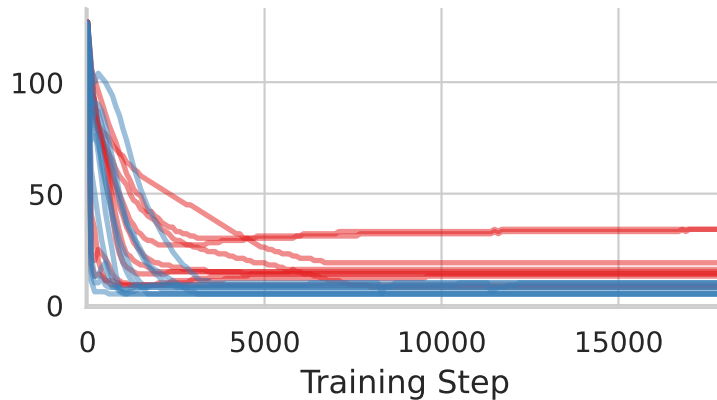

Background Dim = 256

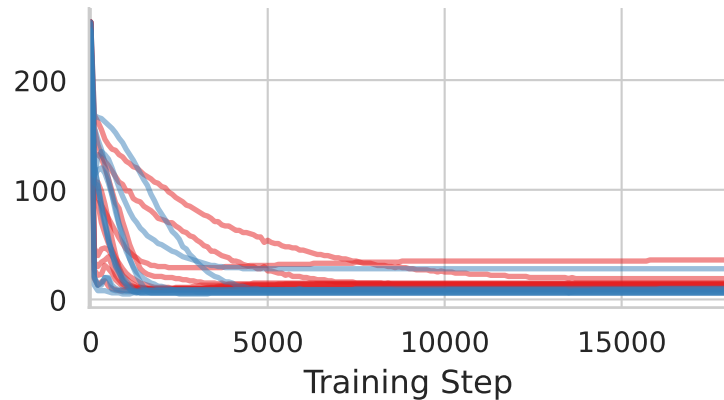

Supplement: supplementary_material [file codebook_eff_dim_over_global_step.pdf › repo/512_figures/codebook_eff_dim_over_global_step.pdf]

# Correlation of Code Restart Threshold with Effective Dim

Average correlation:  $r = -0.02$

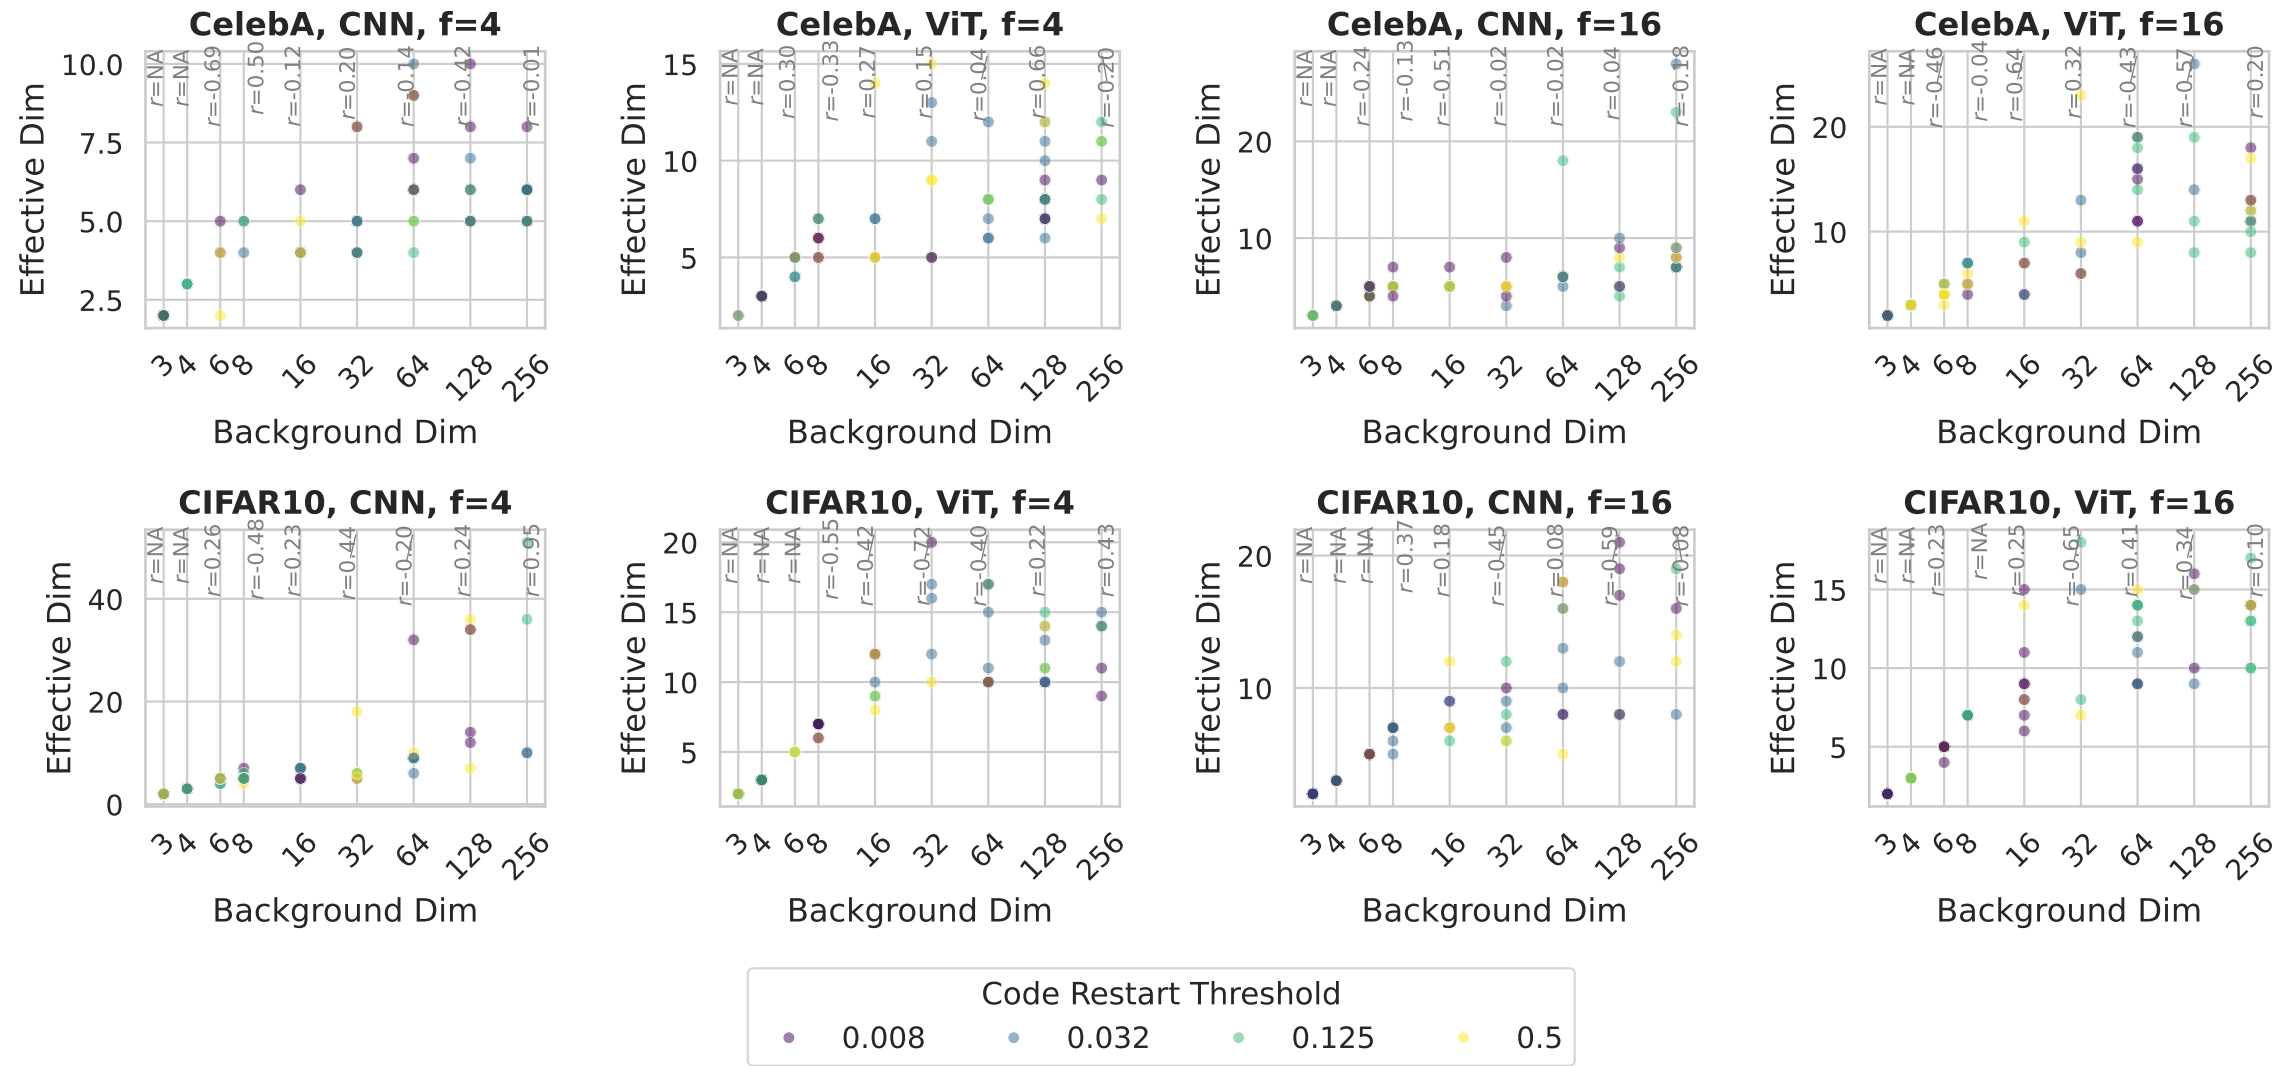

Supplement: supplementary_material [file corr_eff_dim_vs_Code Restart Threshold.pdf › repo/512_figures/corr_eff_dim_vs_Code Restart Threshold.pdf]

# Correlation of Codebook Size with Effective Dim

Average correlation:  $r = 0.42$

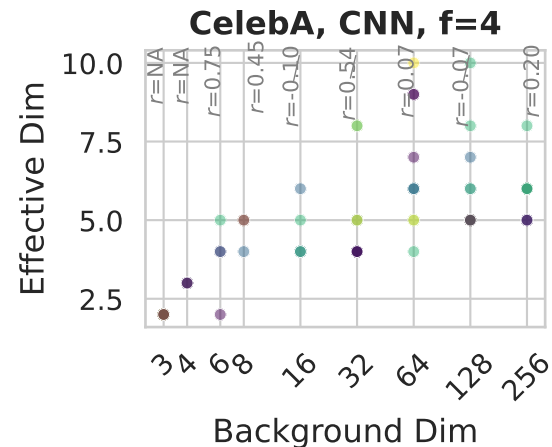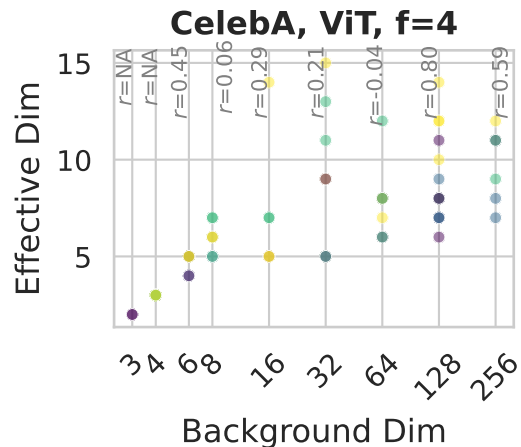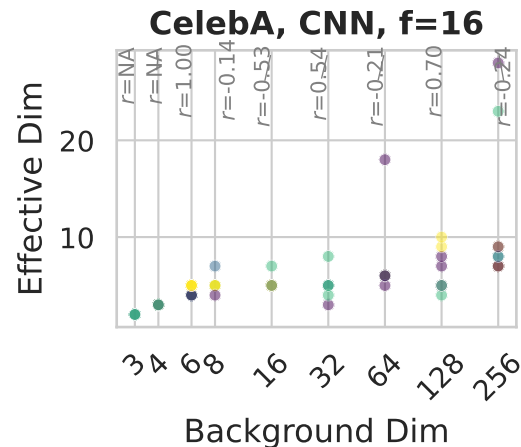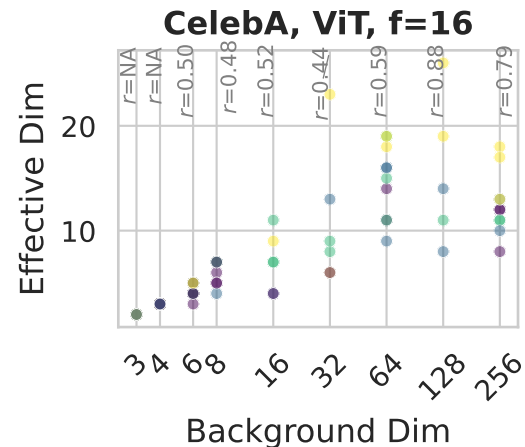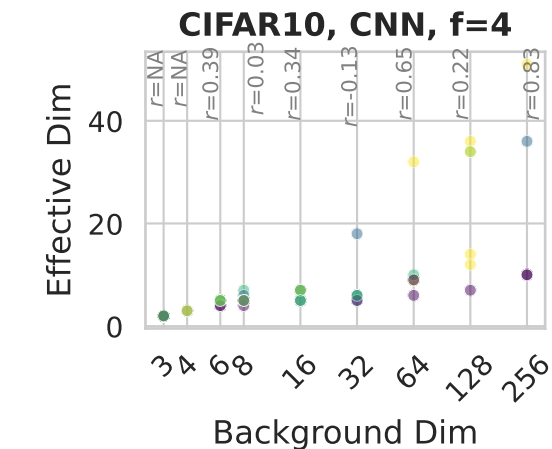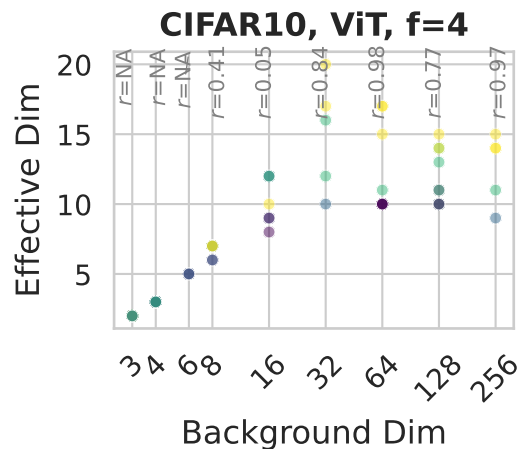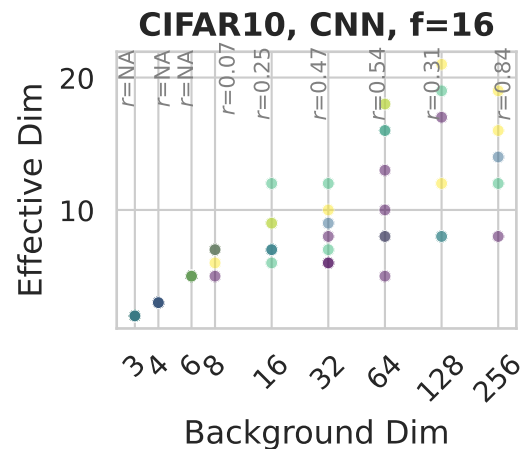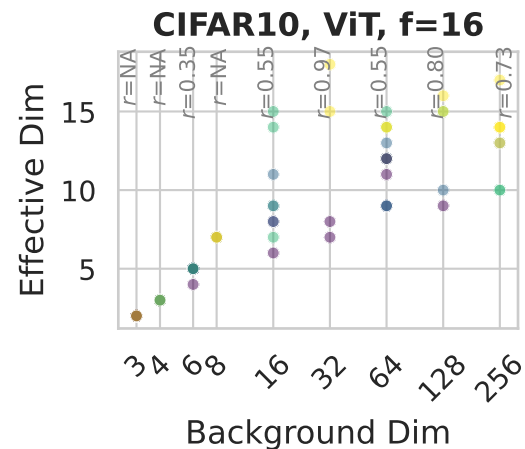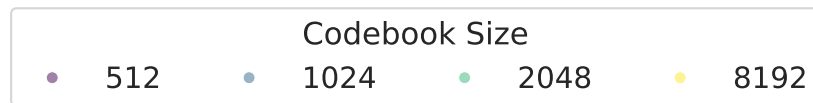

Supplement: supplementary_material [file corr_eff_dim_vs_Codebook Size.pdf › repo/512_figures/corr_eff_dim_vs_Codebook Size.pdf]

# Correlation of EMA Decay with Effective Dim

Average correlation:  $r = 0.03$

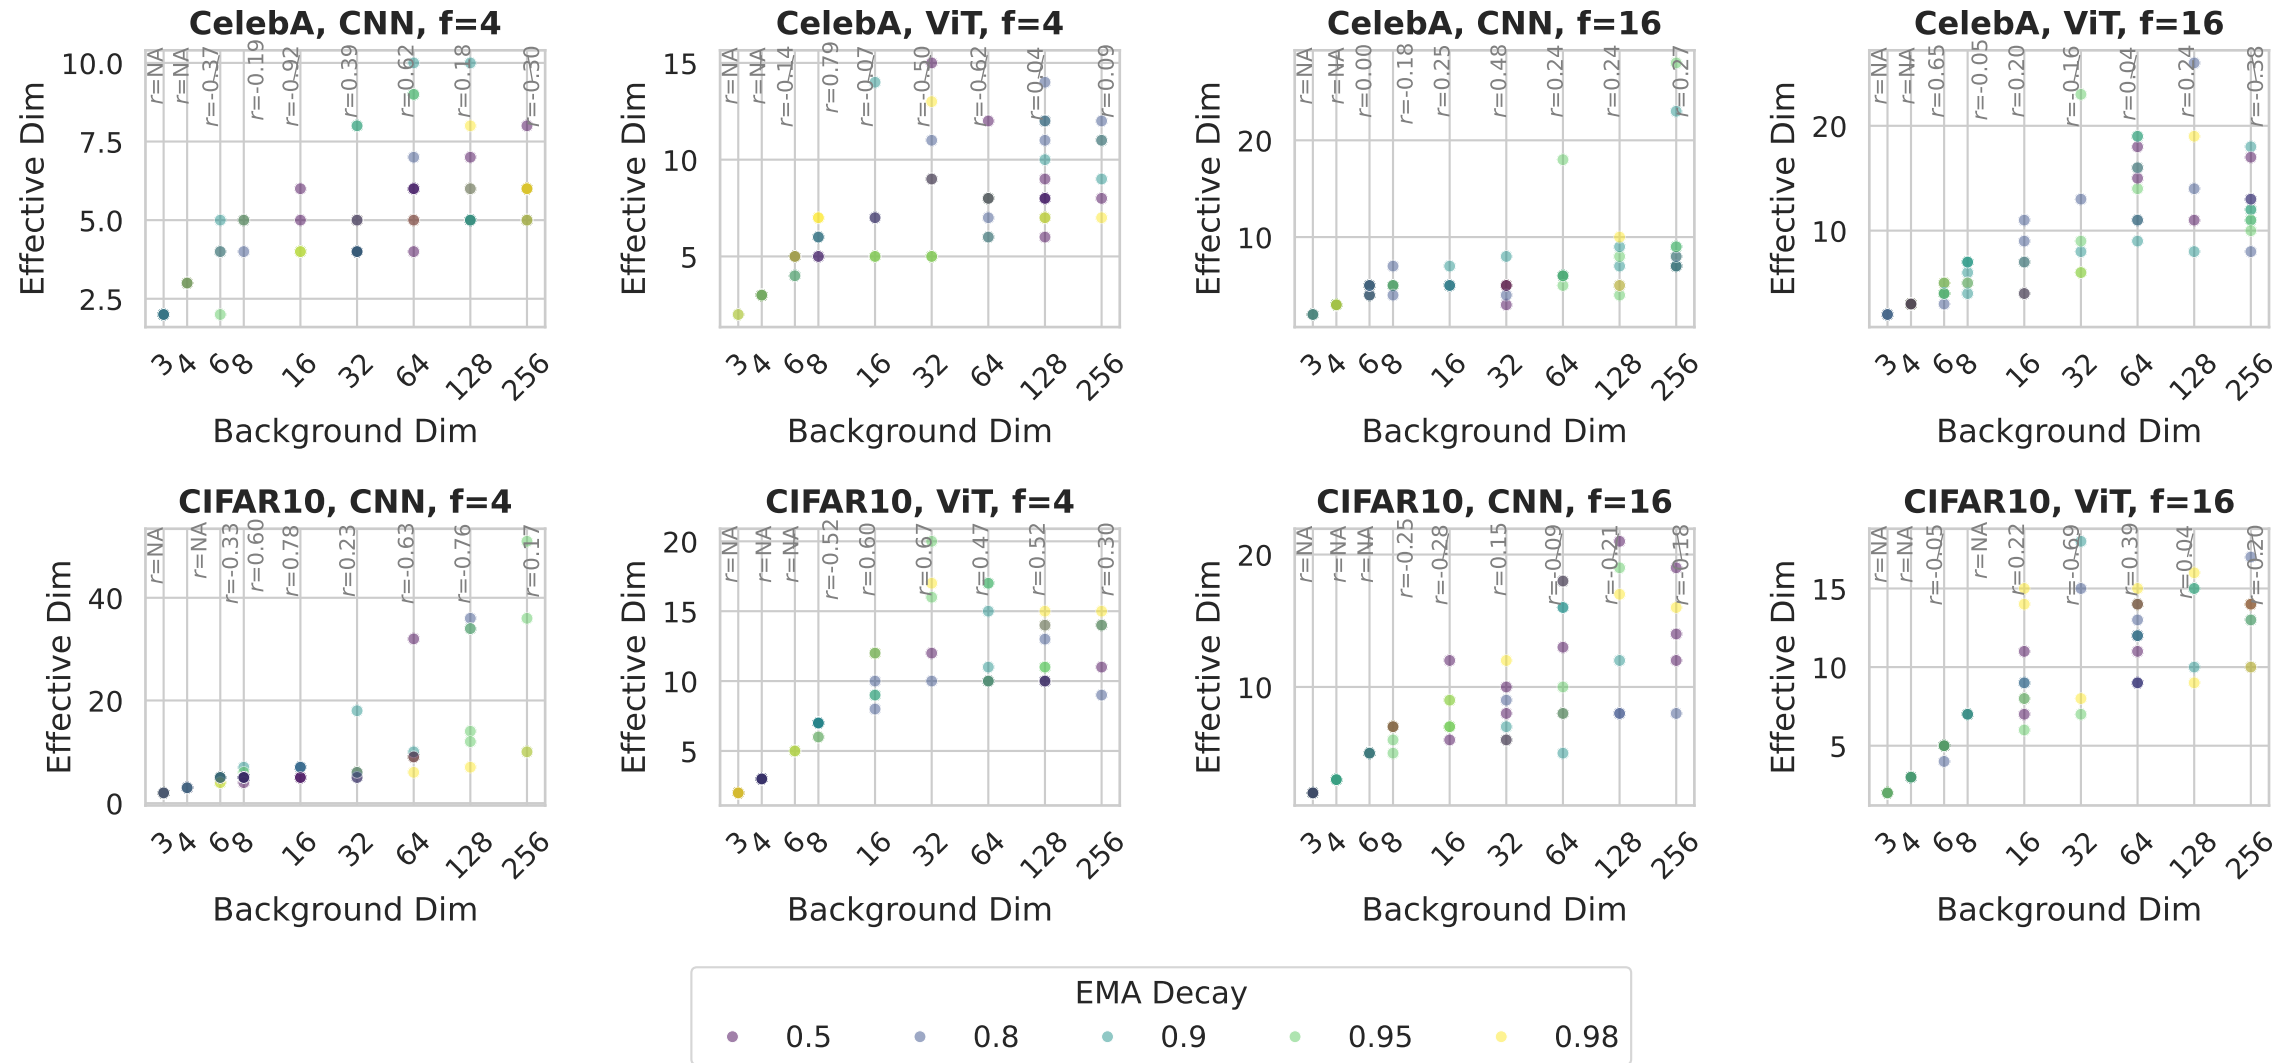

Supplement: supplementary_material [file corr_eff_dim_vs_EMA Decay.pdf › repo/512_figures/corr_eff_dim_vs_EMA Decay.pdf]

# Correlation of Rotation Trick with Effective Dim

Average correlation:  $r = 0.26$

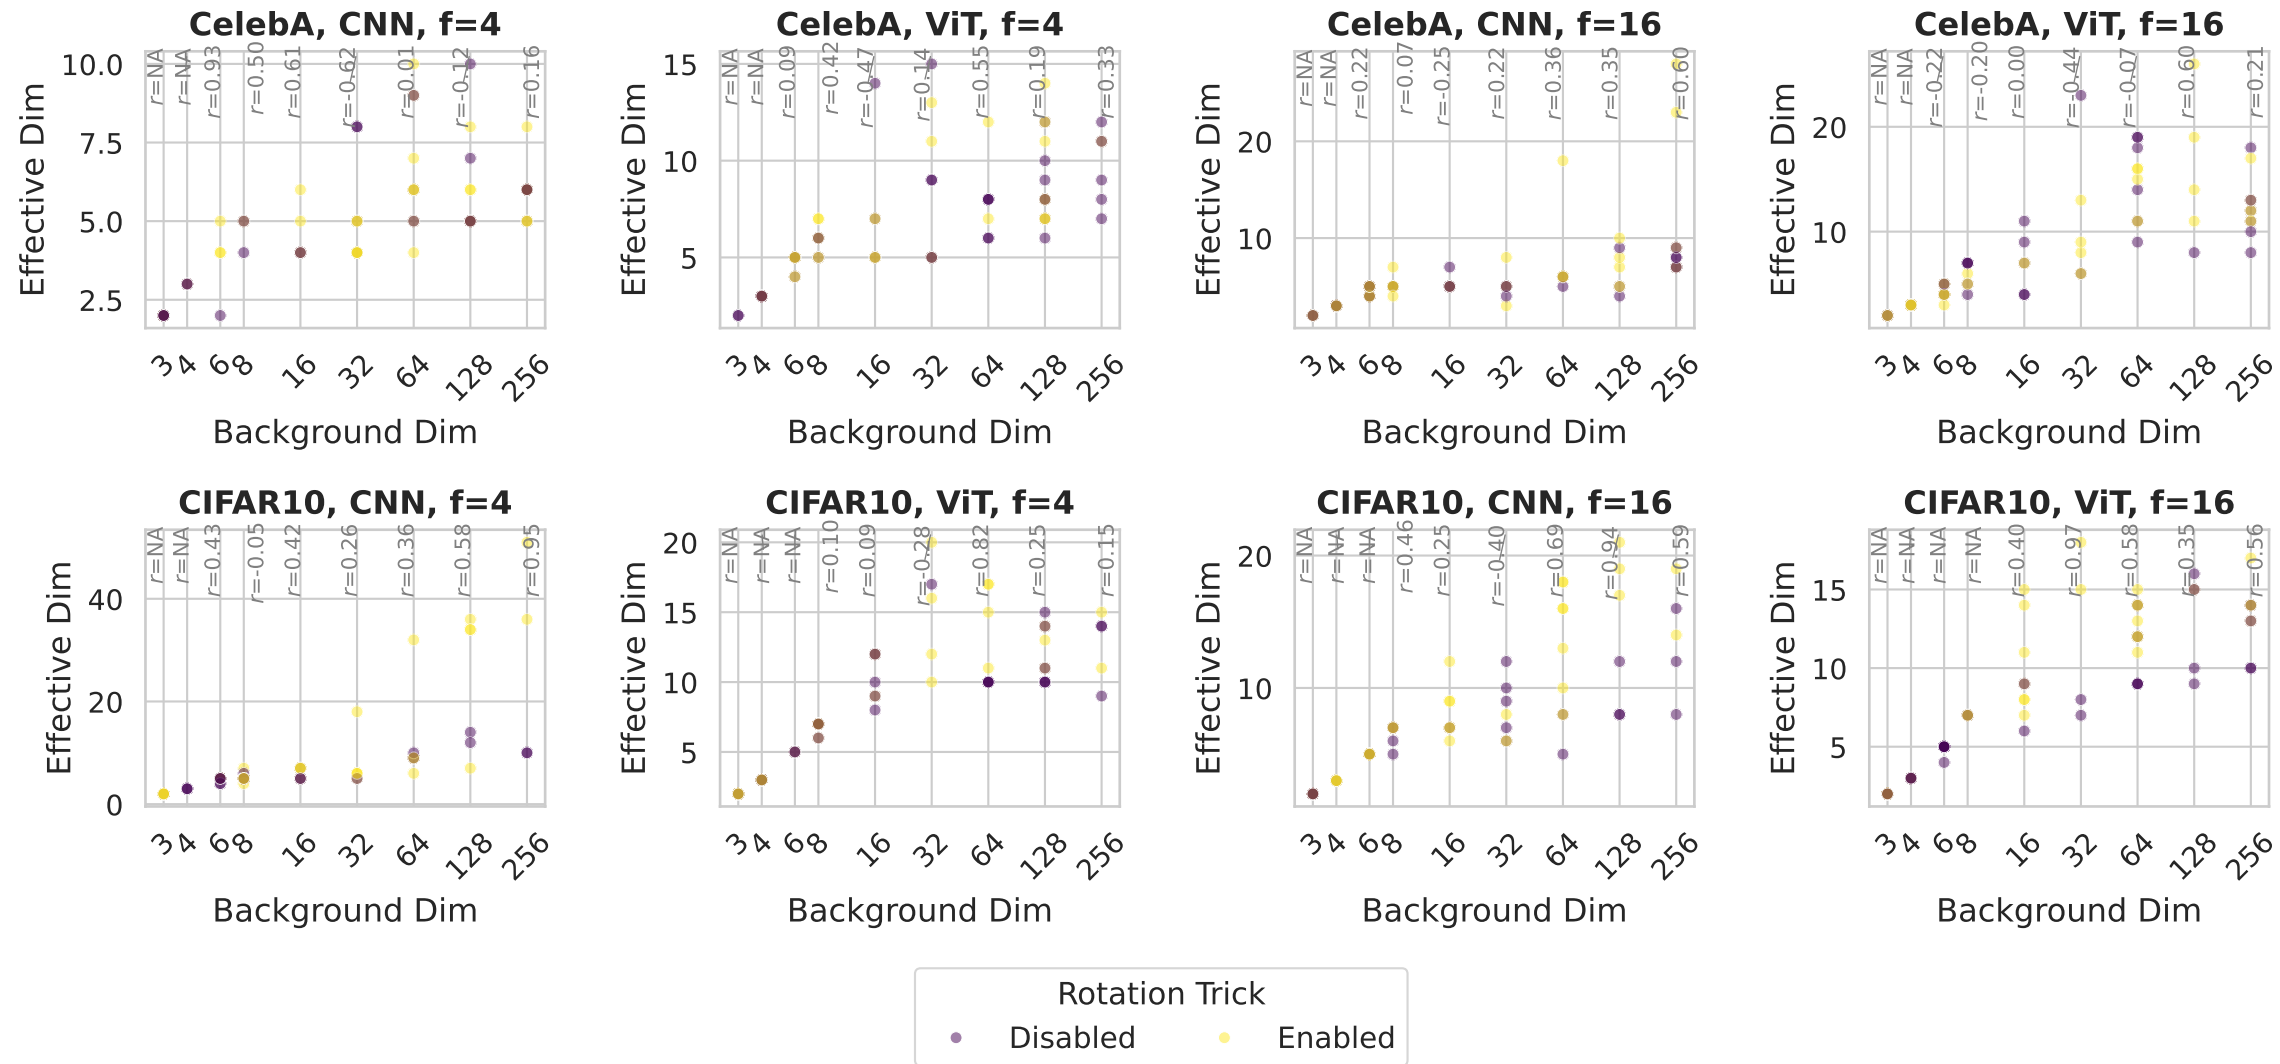

Supplement: supplementary_material [file corr_eff_dim_vs_Rotation Trick.pdf › repo/512_figures/corr_eff_dim_vs_Rotation Trick.pdf]

# Validation Loss vs Dim Usage

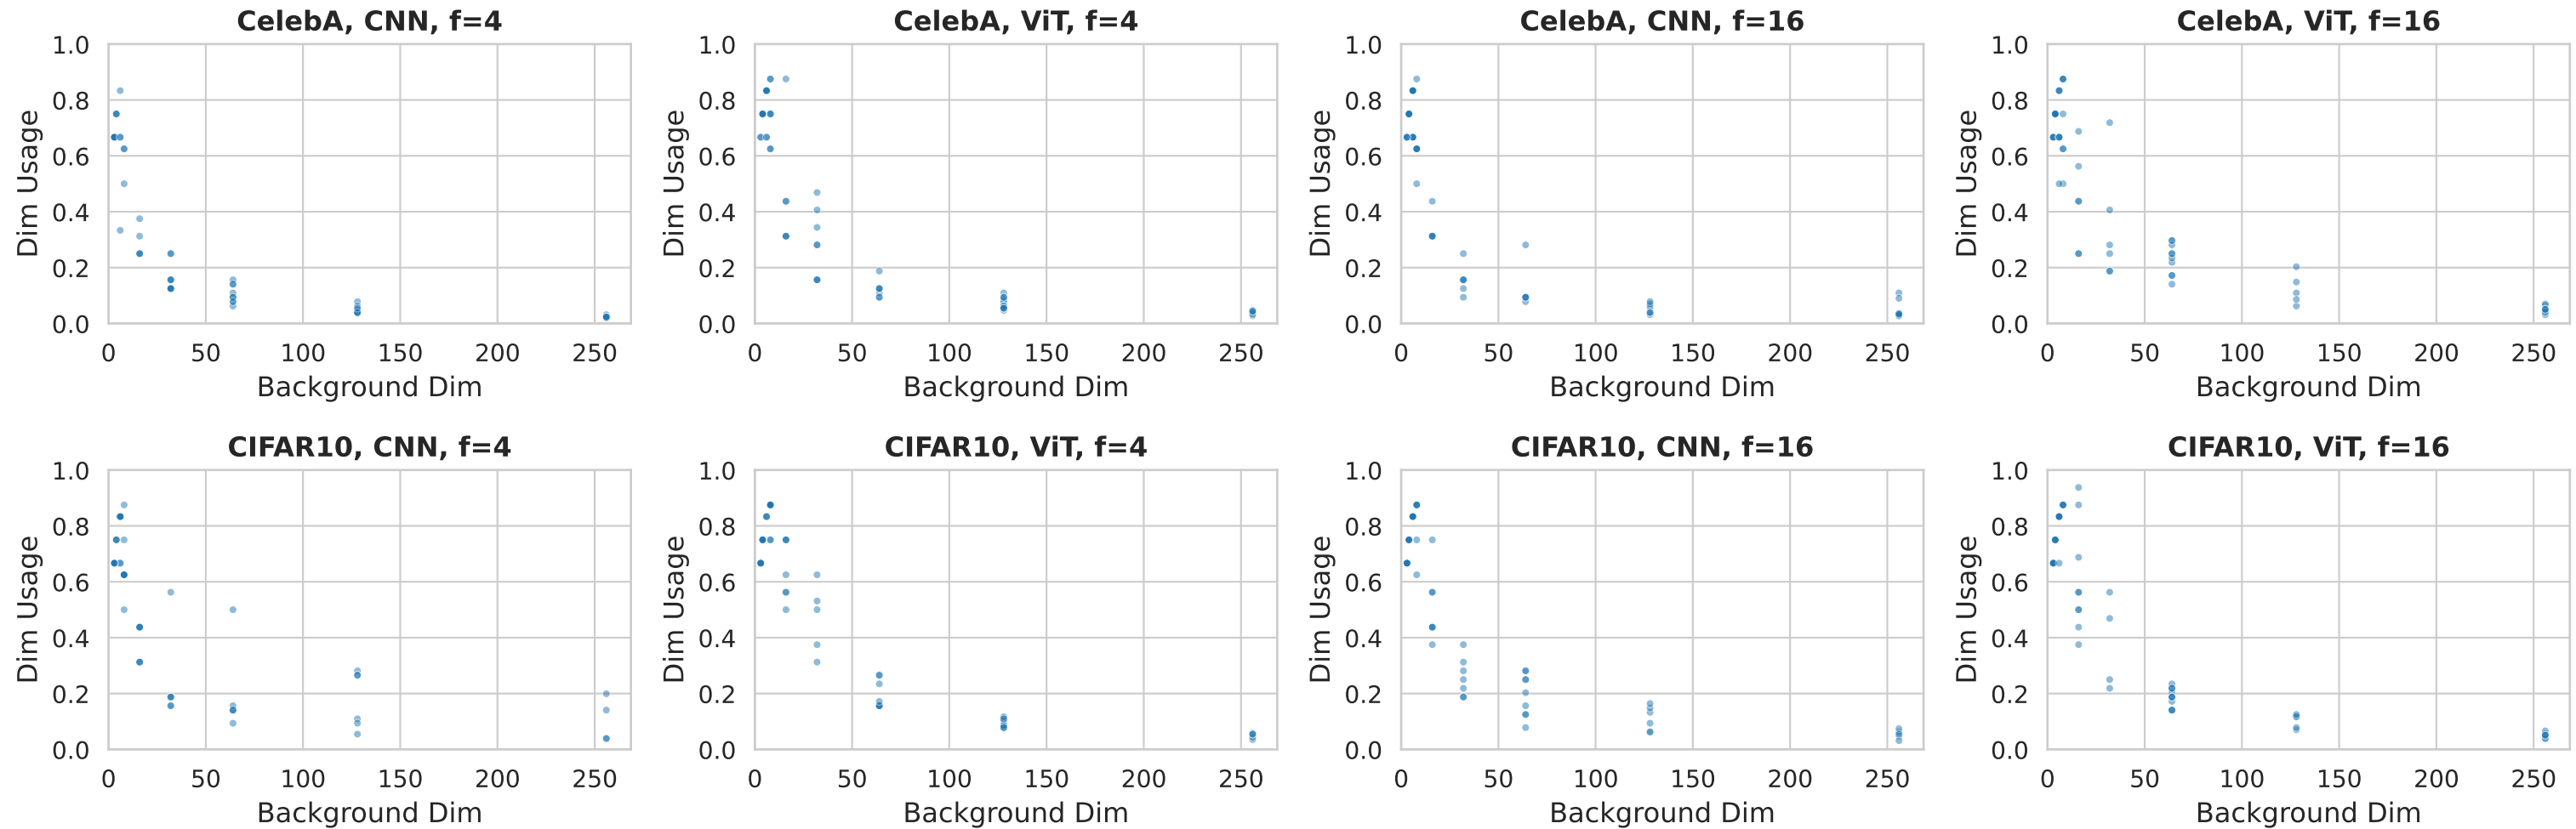

5

Supplement: supplementary_material [file large_scale_dim_usage_vs_background_dim.pdf › repo/512_figures/large_scale_dim_usage_vs_background_dim.pdf]

# Effective Dim vs. Background Dim

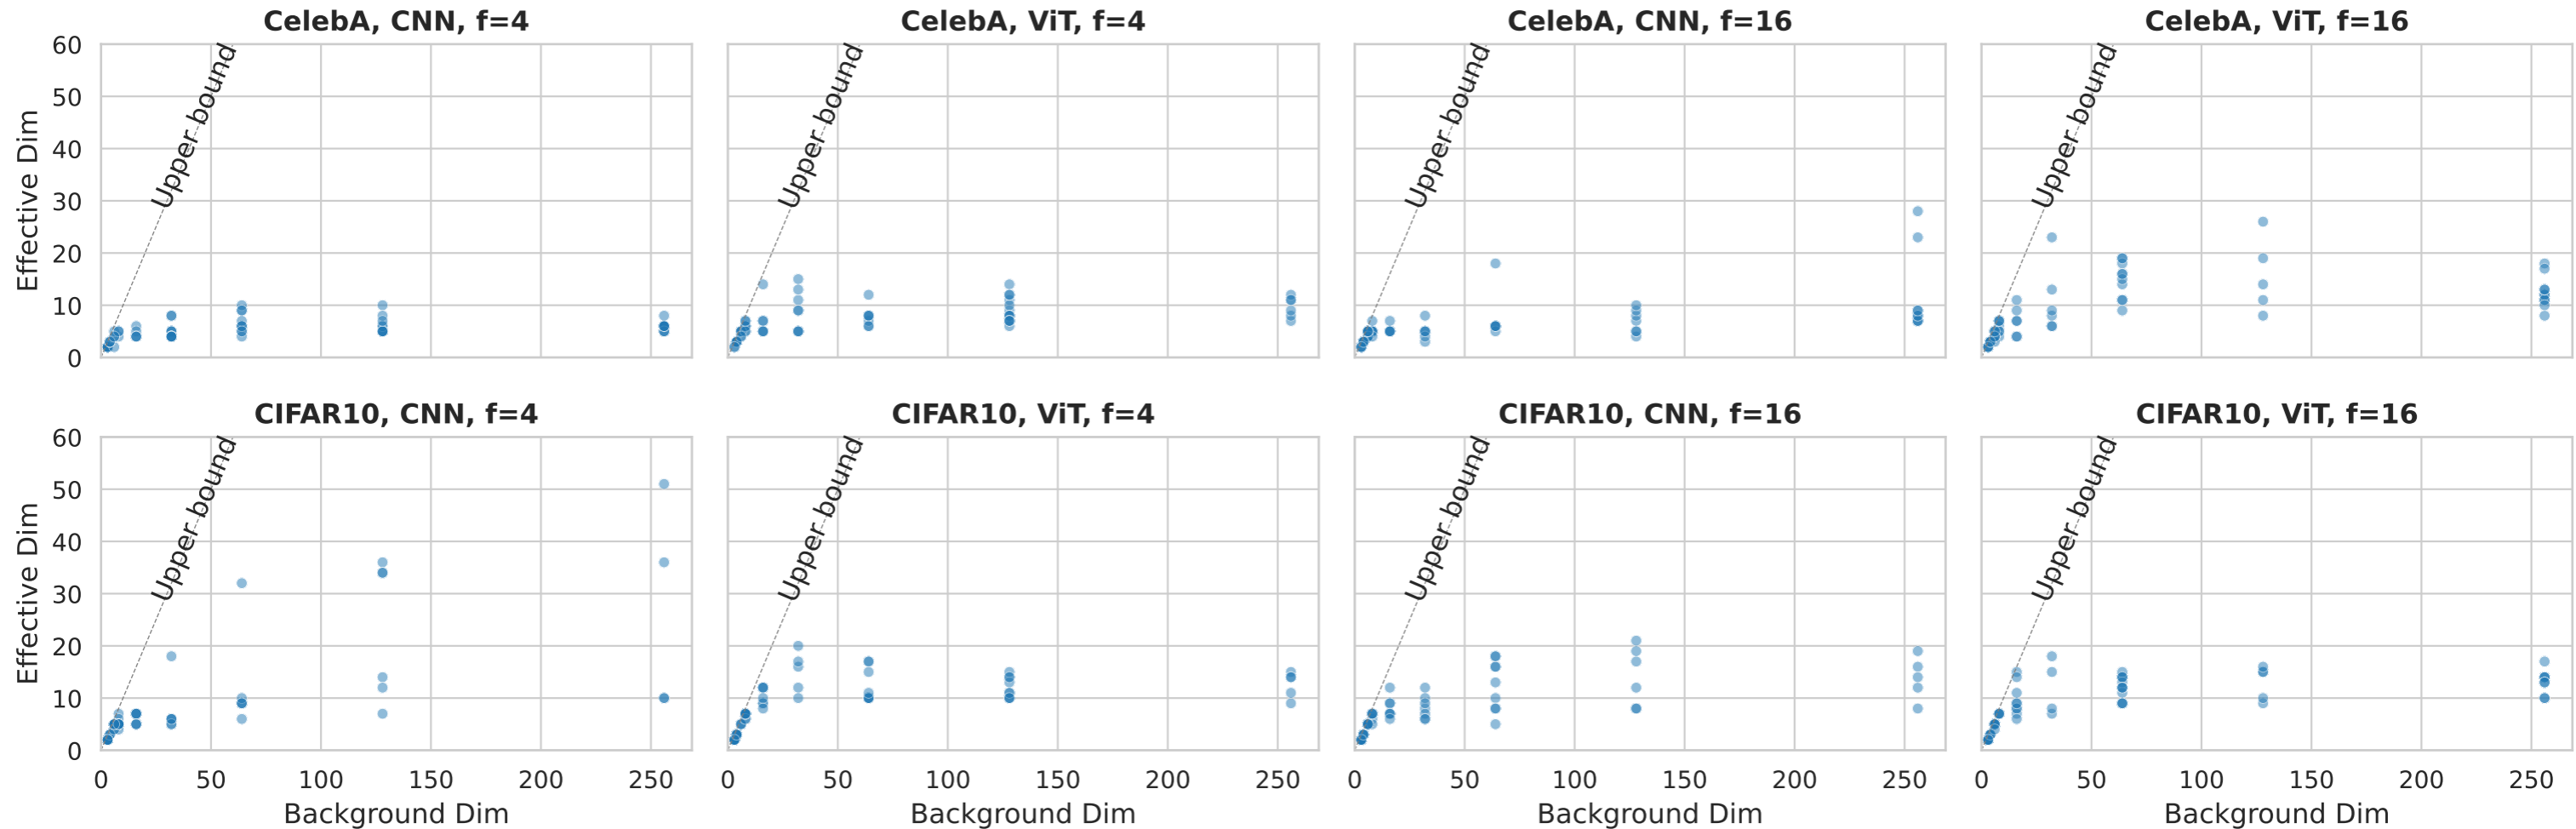

Supplement: supplementary_material [file large_scale_eff_dim_vs_background_dim.pdf › repo/512_figures/large_scale_eff_dim_vs_background_dim.pdf]

# Validation Loss vs Effective Dim vs Codebook Size

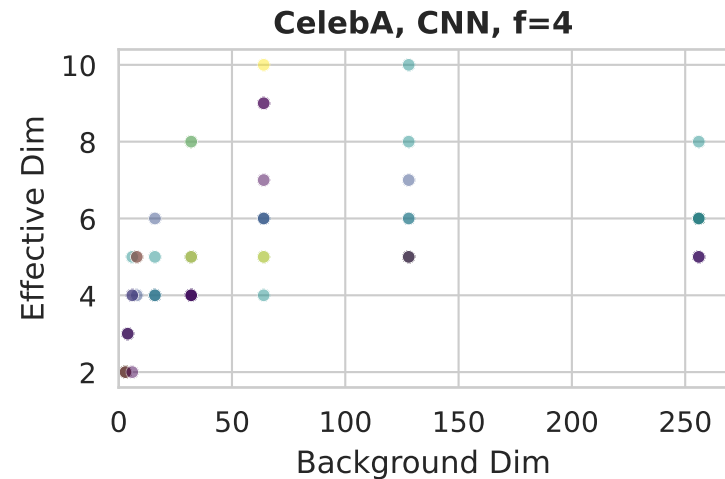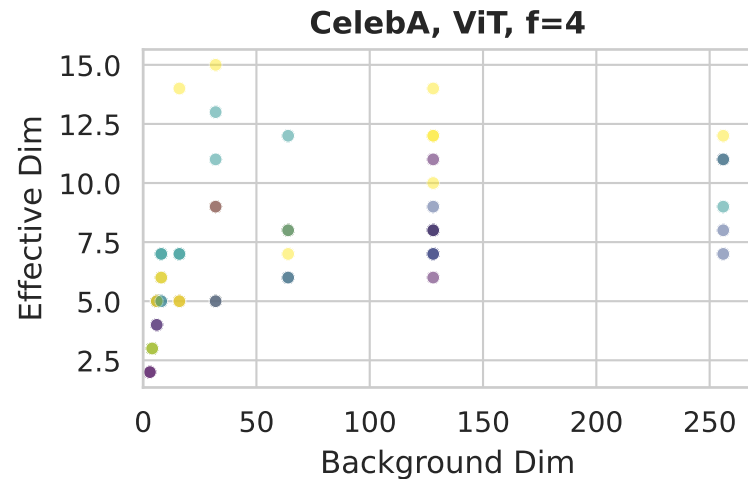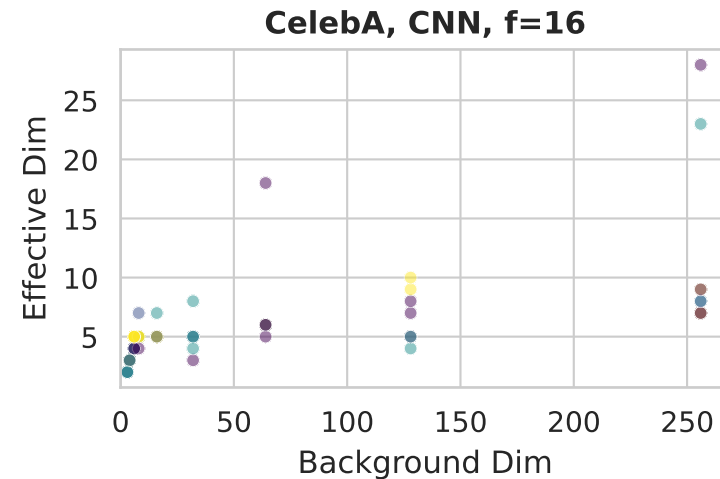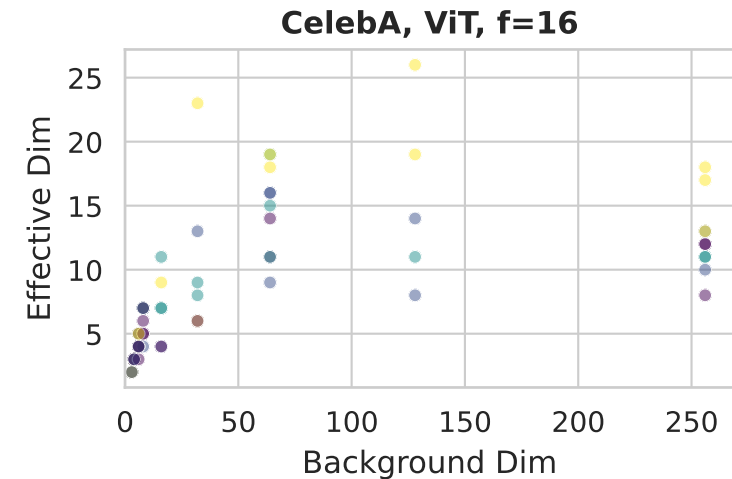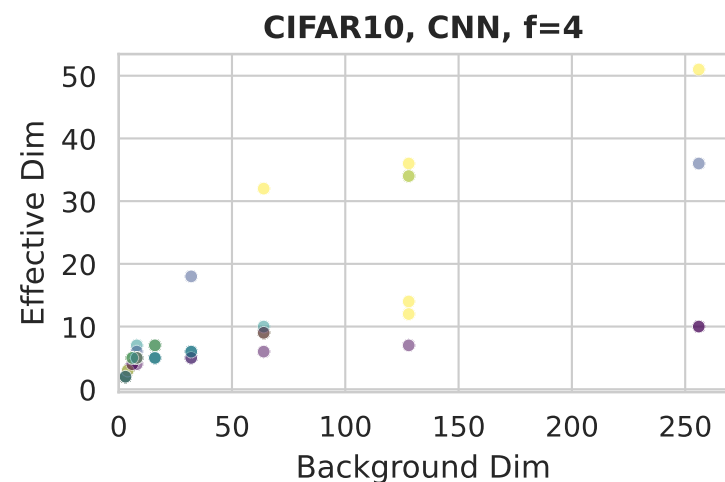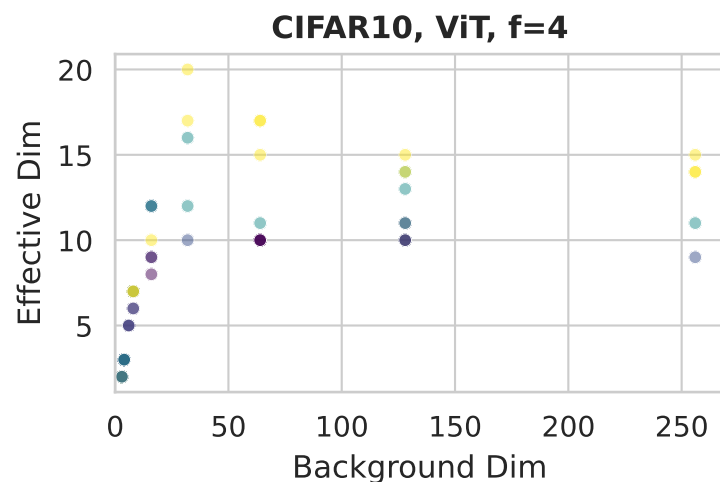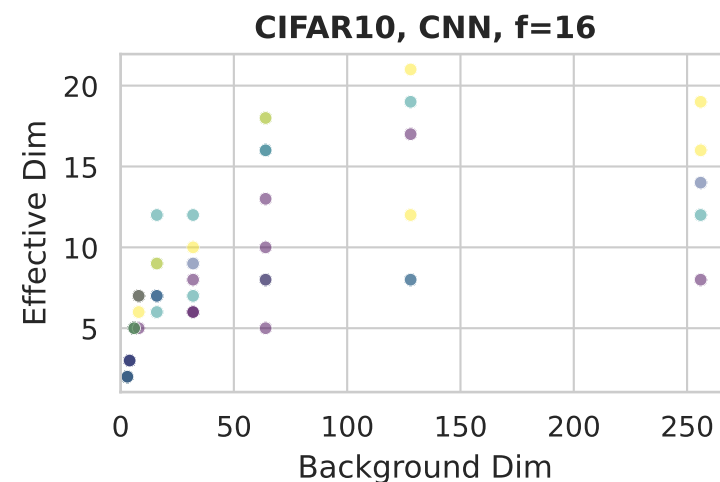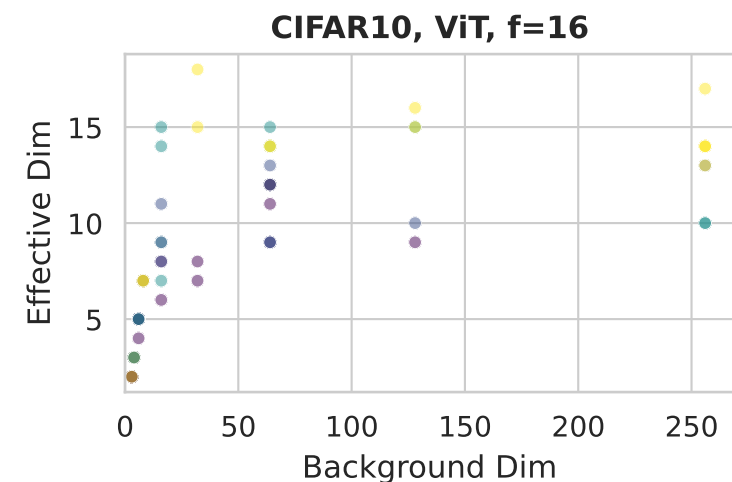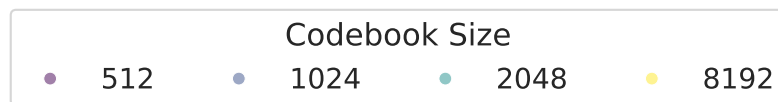

Supplement: supplementary_material [file large_scale_eff_dim_vs_background_dim_vs_codebook_size.pdf › repo/512_figures/large_scale_eff_dim_vs_background_dim_vs_codebook_size.pdf]

# Validation Loss vs. Effective Dimension

**CelebA, CNN, f=16**

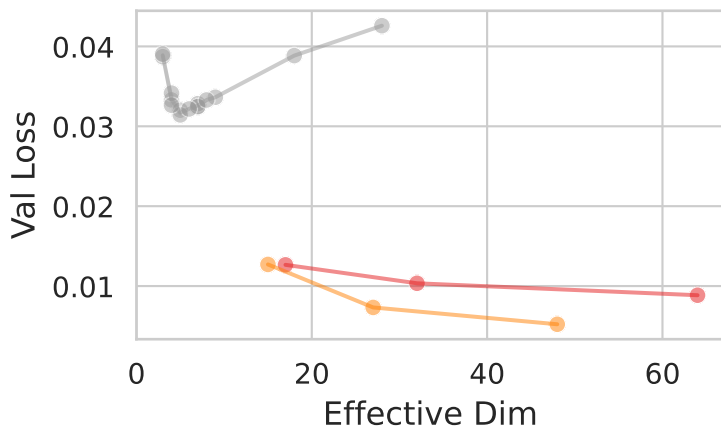

**CelebA, ViT, f=16**

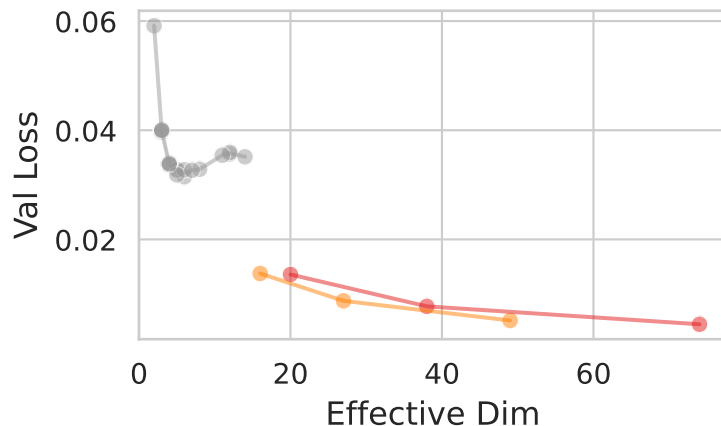

**CIFAR10, CNN, f=16**

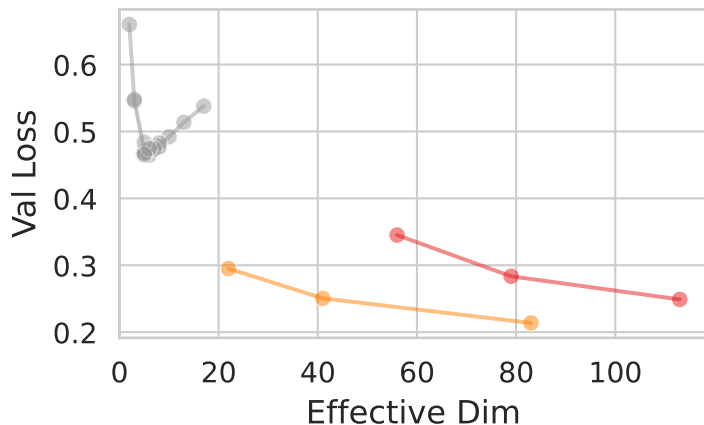

**CIFAR10, ViT, f=16**

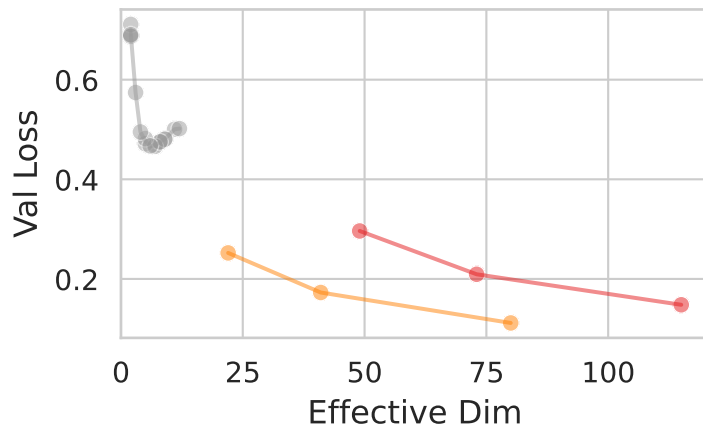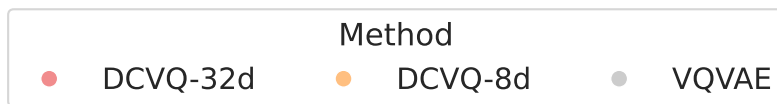

Supplement: supplementary_material [file dcvq_val_loss_vs_eff_dim.pdf › repo/dcvq_figures/dcvq_val_loss_vs_eff_dim.pdf]

Effective Dim

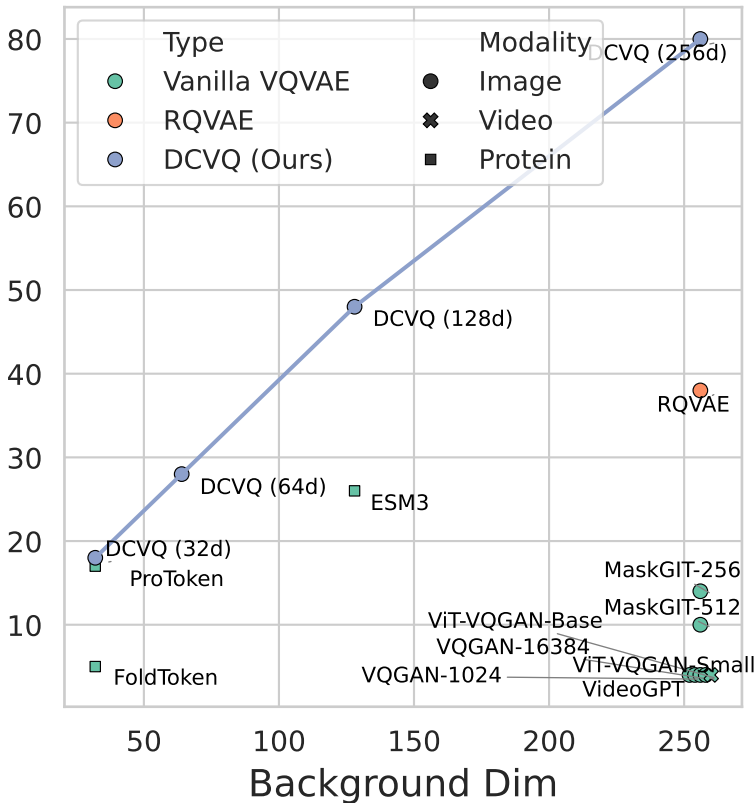

Supplement: supplementary_material [file background_dim_vs_effective_dim.pdf › repo/pretrain_figures/background_dim_vs_effective_dim.pdf]

## Explained Variance (VQGAN)

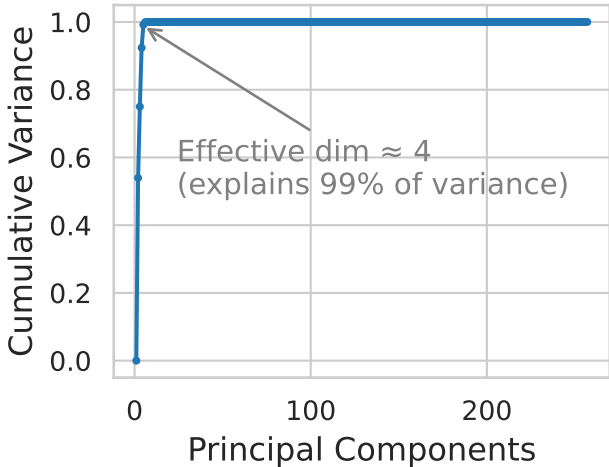

Supplement: supplementary_material [file cumvar_vqgan16384.pdf › repo/pretrain_figures/cumvar_vqgan16384.pdf]
